# Supplementary material
Source: PubMed Central journal article supplement (PMC9885537)
Supplement: Supp_FigS1.pdf [file Supp_FigS1.pdf]

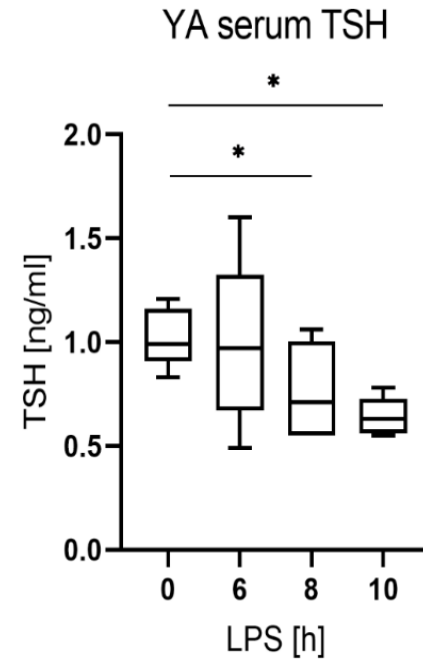

**Supplemental Figure 1. Serum TSH in NTIS**

Male young adult (YA) THAI mice were treated with 150  $\mu$ g/animal LPS *i.p.*

n= 5/group; figure shows Tukey Box Plots,  $\alpha= 0.05$ ; \*: p<0.05
