# Supplementary material
Source: PubMed Central journal article supplement (PMC9885537)
Supplement: Supp_FigS2.pdf [file Supp_FigS2.pdf]

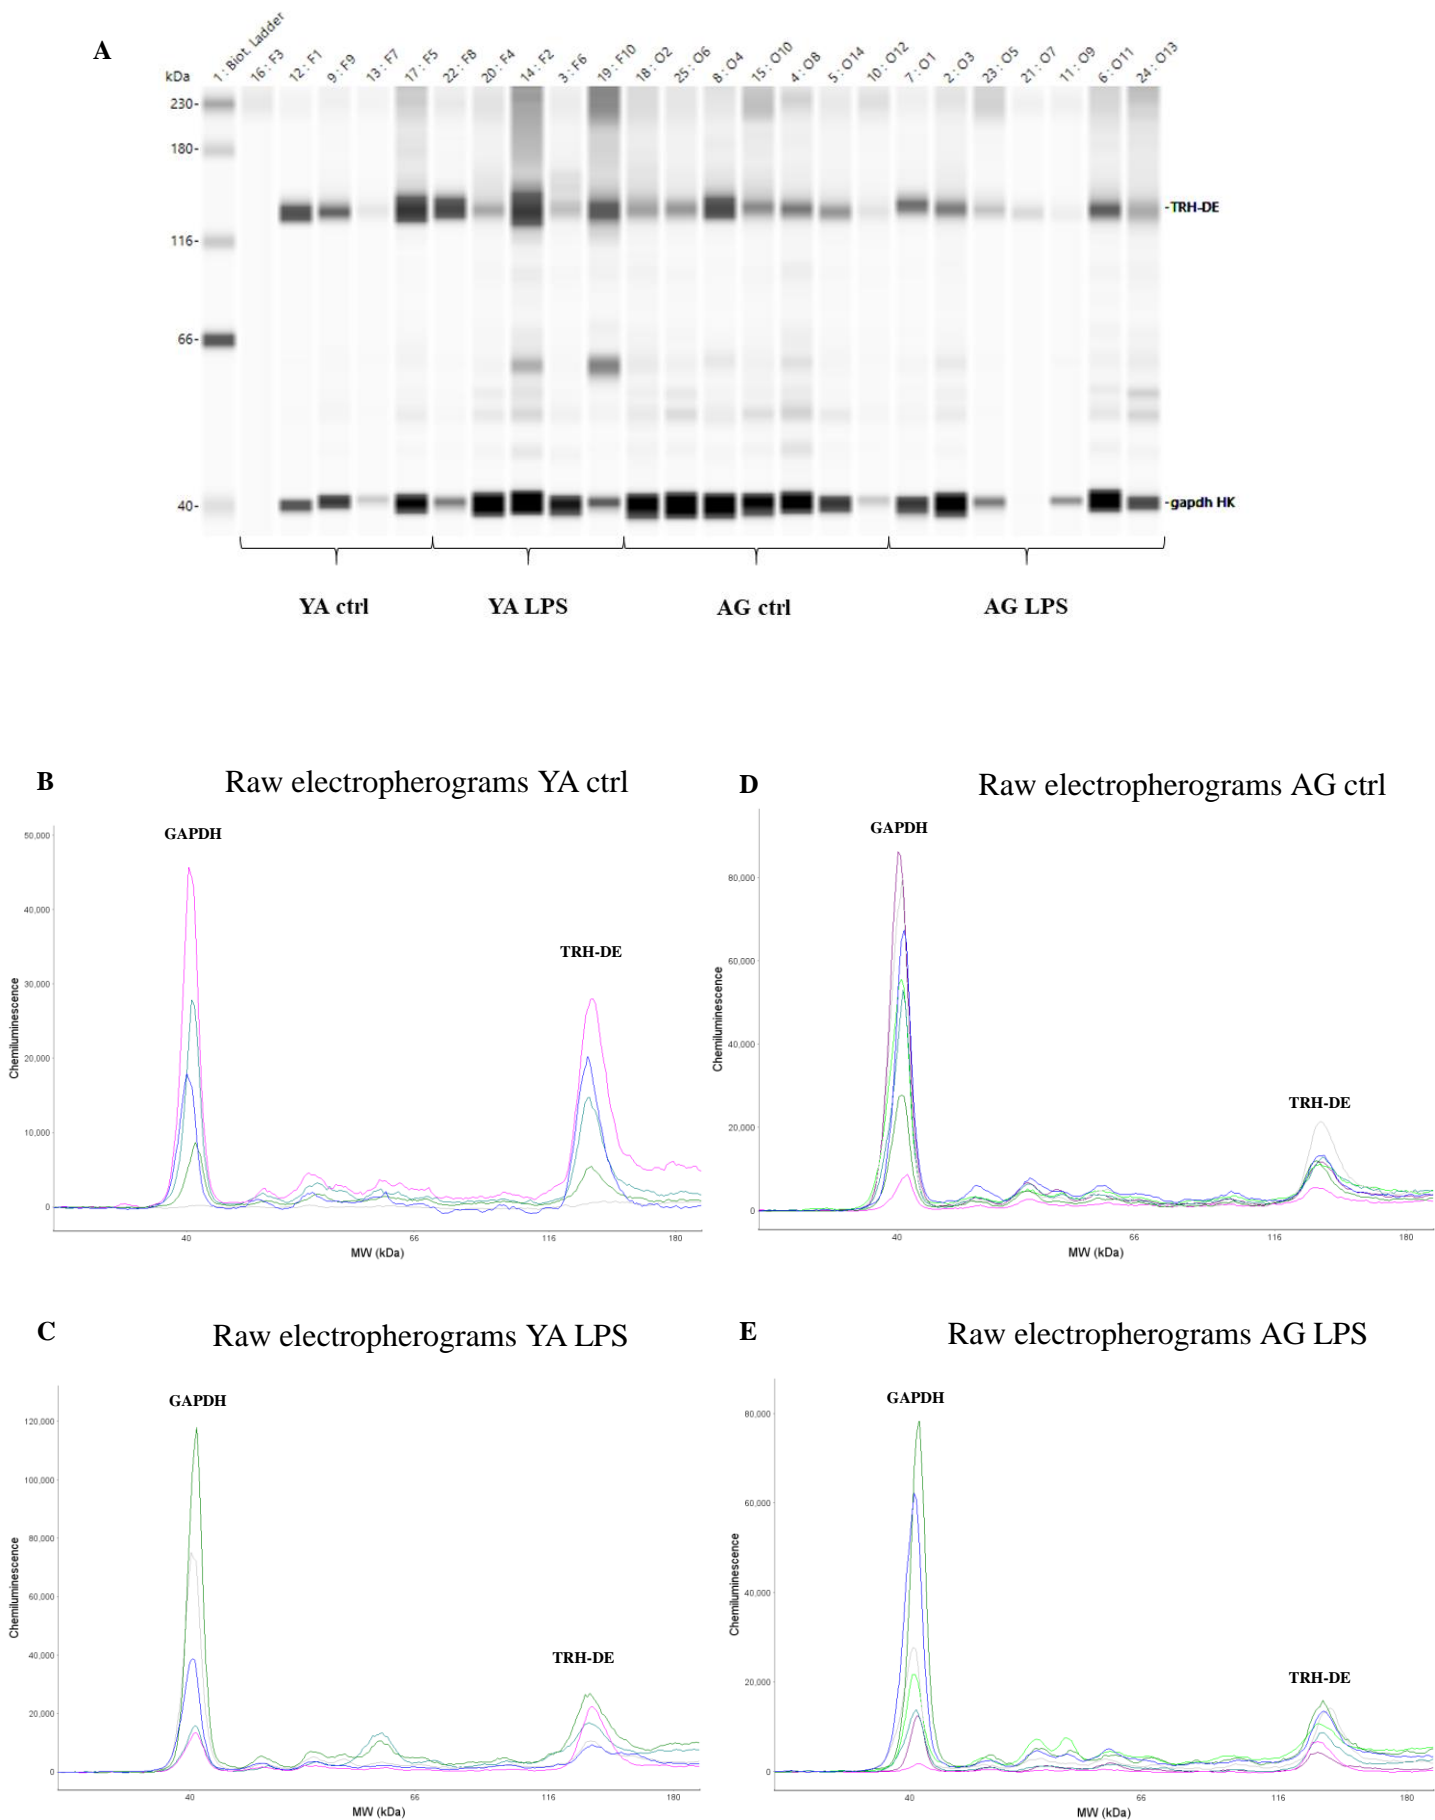

**Supplemental Figure 2. Raw electropherograms and digital gel image of TRH-DE WES simple western capillary electrophoresis**

Male THAI mice were treated with 150  $\mu\text{g}/\text{animal}$  LPS *i.p.*  $n= 5-7/\text{group}$

A: digitally generated gel image of all electropherograms; B-E: raw electropherograms of WES; B-C: young adults (YA); B: 0 h LPS treatment; C: 8 h LPS treatment; D-E: aged adults (AG); D: 0 h LPS treatment; E: 8 h LPS treatment
