# Supplementary material
Source: PubMed Central journal article supplement (PMC9885537)
Supplement: Supp_TableS1.pdf [file Supp_TableS1.pdf]

**Supplemental Table 1: Taqman probes and gene names**

| <b>Gene symbol</b>           | <b>Gene name</b>                                           | <b>Assay ID</b>             |
|------------------------------|------------------------------------------------------------|-----------------------------|
| <i>Dio1</i>                  | deiodinase, iodothyronine, type I                          | Mm00839358_m1               |
| <i>Dio2</i>                  | deiodinase, iodothyronine, type II                         | Mm00515664_m1               |
| <i>Dio3</i>                  | deiodinase, iodothyronine type III                         | Mm00548953_s1               |
| <i>Gapdh</i>                 | glyceraldehyde-3-phosphate dehydrogenase                   | Mm99999915_g1               |
| <i>Hprt1</i>                 | hypoxanthine guanine phosphoribosyl transferase            | Mm01545399_m1               |
| <i>Luc</i>                   | THAI mouse dCpG luciferase                                 | custom probe, see ref. [12] |
| <i>Mct8</i>                  | monocarboxylate transporter 8                              | Mm01232724_m1               |
| <i>Oatp1c1</i>               | solute carrier organic anion transporter family member 1c1 | Mm00451845_m1               |
| <i>proTrh</i>                | Thyrotropin-releasing hormone                              | Mm01963590_s1               |
| <i>Trh-de</i>                | TRH degrading ectoenzyme                                   | Mm00455443_m1               |
| <i>Trh-r1</i>                | TRH receptor 1                                             | Mm00443262_m1               |
| <i>Tsh<math>\beta</math></i> | Thyroid-stimulating hormone                                | Mm03990915_g1               |
